# Supplementary material for: Hacktive matter: data-driven discovery through hackathon-based cross-disciplinary coding
Source: Royal Society of Chemistry journal article supplement (doi:10.1039/d5sm00401b), 2025-01-01
Supplement: d5sm00401b1.pdf [file d5sm00401b1.pdf]

## **Hacktive Matter: data-driven discovery through hackathon-based cross-disciplinary coding**

Megan T. Valentine<sup>1</sup> and Rae M. Robertson-Anderson<sup>2</sup>

<sup>1</sup>Department of Mechanical Engineering, University of California, Santa Barbara

<sup>2</sup>Department of Physics and Biophysics, University of San Diego

Correspondence

[valentine@engineering.ucsb.edu](mailto:valentine@engineering.ucsb.edu)

[randerson@san Diego.edu](mailto:randerson@san Diego.edu)

### **Supplementary Materials**

**Year 1 Post-survey questions**

**Year 2 Post-survey questions**

**Year 3 Post-survey questions**

## Year 1 Post-survey questions

1. What best describes you?  
*Multiple choice: faculty, postdoc, postbac, graduate student, undergraduate, staff scientist, high school student*
2. How comfortable were you with DDM before the hackathon?  
*Likert scale (1-5): 'not at all' to 'very'*
3. My understanding of the physical principles used in DDM analysis has increased.  
*Likert scale (1-5): 'strongly disagree' to 'strongly agree'*
4. My understanding of modeling approaches used to analyze the data collected in this project has increased.  
*Likert scale (1-5): 'strongly disagree' to 'strongly agree'*
5. My understanding of the relationships between material dynamics and rheology has increased.  
*Likert scale (1-5): 'strongly disagree' to 'strongly agree'*
6. I have gained new skills in using various software platforms to analyze data.  
*Likert scale (1-5): 'strongly disagree' to 'strongly agree'*
7. I have a better understanding what my collaborators are working on and how they are approaching this project.  
*Likert scale (1-5): 'strongly disagree' to 'strongly agree'*
8. After this workshop, my interest in working on active materials has:  
*Likert scale (1-5): 'strongly decreased' to 'strongly increased'*
9. After this workshop, my confidence in discussing my results has:  
*Likert scale: 'strongly decreased' to 'strongly increased'*
10. I expect to use what I learned in the hackathon in my research:  
*Multiple choice: right away, in the next 6-12 months, maybe later, likely never*
11. The length of time of the hackathon was:  
*Multiple choice: too short, too long, about right*
12. In thinking about the lectures, there were:  
*Multiple choice: too many, too few, about right*
13. In thinking about the lectures, they were generally:  
*Multiple choice: too technical, too simple, about right*
14. In thinking about the group work, there were:  
*Multiple choice: too many sessions, too few sessions, about right*

15. In thinking about the group work:  
*Multiple choice: I would have preferred more structure, I would have liked less structure, I liked the format we used*
16. I would be interested in attending the next hackathon:  
*Multiple choice: Yes, No, Maybe*
17. Please share some of your favorite aspects of the workshop  
*Short answer reply*
18. Please tell us if there were things that could be improved  
*Short answer reply*
19. Any other feedback?  
*Short answer reply*

## Year 2 Post-survey questions

1. What best describes you?  
*Multiple choice: faculty, postdoc, postbac, graduate student, undergraduate, staff scientist, high school student*
2. How long have you worked in the biomaterials field?  
*Multiple choice: < 1 year; 1-3 years; 3-5 years; 5-10 years; >10 years*
3. How comfortable were you with the concepts of data screening before the hackathon?  
*Likert scale (1-5): 'not at all' to 'very'*
4. How comfortable were you with the concepts of database creation and management before the hackathon?  
*Likert scale (1-5): 'not at all' to 'very'*
5. My understanding of screening tools has increased  
*Likert scale (1-5): 'strongly disagree' to 'strongly agree'*
6. I have gained new skills in using various software platforms to analyze data.  
*Likert scale (1-5): 'strongly disagree' to 'strongly agree'*
7. My understanding of database tools has increased  
*Likert scale (1-5): 'strongly disagree' to 'strongly agree'*
8. My understanding of the approaches and skills of other DMREF team members has increased  
*Likert scale (1-5): 'strongly disagree' to 'strongly agree'*
9. I expect to use what I learned in the hackathon in my research  
*Multiple choice: right away, in the next 6-12 months, maybe later, likely never*
10. I expect that what I developed at the hackathon will be useful to others in my group  
*Multiple choice: right away, in the next 6-12 months, maybe later, likely never*
11. I expect that what I developed at the hackathon will be useful to researchers in other groups  
*Multiple choice: right away, in the next 6-12 months, maybe later, likely never*
12. I expect to use code that others developed in the hackathon in my own research  
*Multiple choice: right away, in the next 6-12 months, maybe later, likely never*
13. The length of time of the hackathon as:  
*Multiple choice: too short, too long, about right*
14. The scope of work for the hackathon was:  
*Multiple choice: too much, too little, just right*
15. I would be interested in attending the next hackathon:  
*Multiple choice: Yes, No, Maybe*

16. Please share some of your favorite aspects of the workshop

*Short answer reply*

17. Please tell us if there were things that could be improved

*Short answer reply*

18. Any other feedback?

*Short answer reply*

### Year 3 Post-survey questions

1. What best describes you?  
*Multiple choice: faculty, postdoc, postbac, graduate student, undergraduate, staff scientist, high school student*
2. I have attended a DMREF Hackathon at UCSB before  
*Multiple choice: Yes, No*
3. How comfortable were you with using Python software before the hackathon?  
*Likert scale (1-5): 'not at all' to 'very'*
4. My understanding of how to DEVELOP software for data screening and analysis has increased.  
*Likert scale (1-5): 'strongly disagree' to 'strongly agree'*
5. My understanding of how to USE software for data screening and analysis has increased.  
*Likert scale (1-5): 'strongly disagree' to 'strongly agree'*
6. I have gained new skills in using Python for data analysis  
*Likert scale (1-5): 'strongly disagree' to 'strongly agree'*
7. My understanding of high-throughput data processing has increased.  
*Likert scale (1-5): 'strongly disagree' to 'strongly agree'*
8. I have a better understanding of what my collaborators are working on and how they are approaching this project  
*Likert scale (1-5): 'strongly disagree' to 'strongly agree'*
9. After this workshop, my interest in working on data-driven analysis and modeling has  
*Likert scale (1-5): 'strongly decreased' to 'strongly increased'*
10. After this workshop, my interest in working on active materials design has  
*Likert scale (1-5): 'strongly decreased' to 'strongly increased'*
11. After this workshop, my interest in working more closely with my collaborators has  
*Likert scale (1-5): 'strongly decreased' to 'strongly increased'*
12. I expect to use what I learned in the hackathon in my research:  
*Multiple choice: right away, in the next 6-12 months, maybe later, likely never*
13. The length of time of the hackathon was:  
*Multiple choice: too short, too long, about right*
14. In thinking about the hackathon organization:  
*Multiple choice: I would have preferred more structure, I would have liked less structure, I liked the format we used*

15. I would be interested in attending the next hackathon:  
*Multiple choice: Yes, No, Maybe*
16. Please share some of your favorite aspects of the workshop  
*Short answer reply*
17. Please tell us if there were things that could be improved  
*Short answer reply*
18. Any other feedback?  
*Short answer reply*
